# Supplementary material for: Indo-Pacific regional extremes aggravated by changes in tropical weather patterns
Source: Springer Nature journal article supplement (doi:10.1038/s41561-024-01537-8), 2024-10-01
Supplement: 41561_2024_1537_MOESM1_ESM.pdf [file 41561_2024_1537_MOESM1_ESM.pdf]

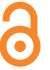

---

# Indo-Pacific regional extremes aggravated by changes in tropical weather patterns

---

In the format provided by the authors and unedited

|    |                                                                       |           |
|----|-----------------------------------------------------------------------|-----------|
| 1  | <b>Contents</b>                                                       |           |
| 2  | <b>1 Sensitivity study of the trend analysis</b>                      | <b>2</b>  |
| 3  | <b>2 Frequency maps and EM-DAT results for the other three</b>        |           |
| 4  | <b>seasons: MAM, JJA, and SON</b>                                     | <b>5</b>  |
| 5  | <b>3 Role of variability on weather extremes for the three other</b>  |           |
| 6  | <b>seasons: MAM, JJA, and SON</b>                                     | <b>12</b> |
| 7  | 3.1 ENSO-driven variability . . . . .                                 | 13        |
| 8  | 3.2 IOD-driven variability . . . . .                                  | 15        |
| 9  | 3.3 PDO-driven variability . . . . .                                  | 16        |
| 10 | 3.4 AMO-driven variability . . . . .                                  | 18        |
| 11 | <b>4 Distribution of identified patterns with respect to modes of</b> |           |
| 12 | <b>variability</b>                                                    | <b>19</b> |
| 13 | <b>5 Frequency maps conditioned to modes of variability</b>           | <b>21</b> |
| 14 | <b>6 Regional impacts of weather extremes associated with emerg-</b>  |           |
| 15 | <b>ing weather patterns</b>                                           | <b>33</b> |
| 16 | <b>7 Example of weather pattern and associated extreme</b>            | <b>34</b> |
| 17 | <b>8 Importance of the study and competing work</b>                   | <b>37</b> |
| 18 | 8.1 Importance of Indo-Pacific climate and ongoing debates . . . . .  | 37        |
| 19 | 8.2 Competing work on weather extremes in the Indo-Pacific . . . . .  | 39        |

## 1 Sensitivity study of the trend analysis

We carried out an extensive sensitivity study of our trend-analysis results. In the manuscript, we report the sensitivity study of the results with respect to (i) the observable used – Extended Data Figs. 2 and 3, (ii) the number of time periods adopted for trend analysis – Extended Data Fig. 4, (iii) the satellite observation era – Extended Data Fig. 7, and (iv) the reanalysis dataset – Figs. 5 and 6.

Here, we report further sensitivity results with respect to (iv) the reanalysis dataset, where we used JRA55 reanalysis data (Supplementary Fig. 1), and 20CR (Supplementary Fig. 2), and with respect to (v) the dimensions of the domain (Supplementary Fig. 3), where we used the extended domain 30°S to 30°N (instead of 20°S to 20°N). These three additional figures have been obtained for a number of bin equal to 9, as the reference results obtained on ERA5 data. The results across these reanalysis datasets are consistent with the initial findings obtained on ERA5, further supporting the analysis and conclusions.

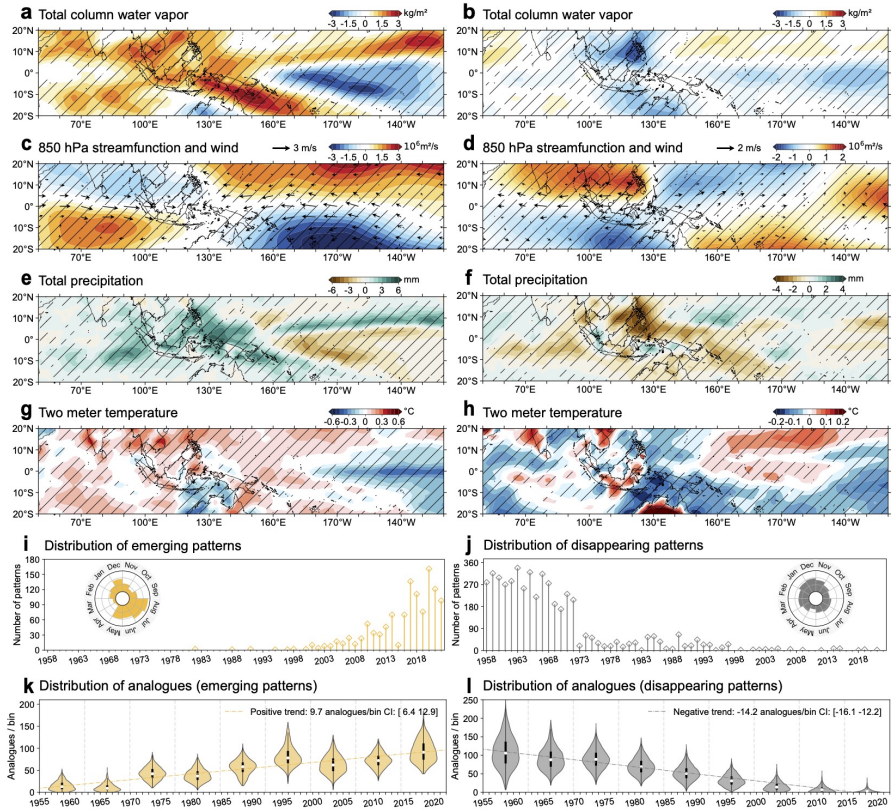

**Supplementary Fig. 1: Composite anomalies (a–h), for patterns with significant occurrence trends (i,j), and associated analogues (k,l), using TCWV as observable. As in Fig. 1, but for the JRA55 reanalysis dataset.**

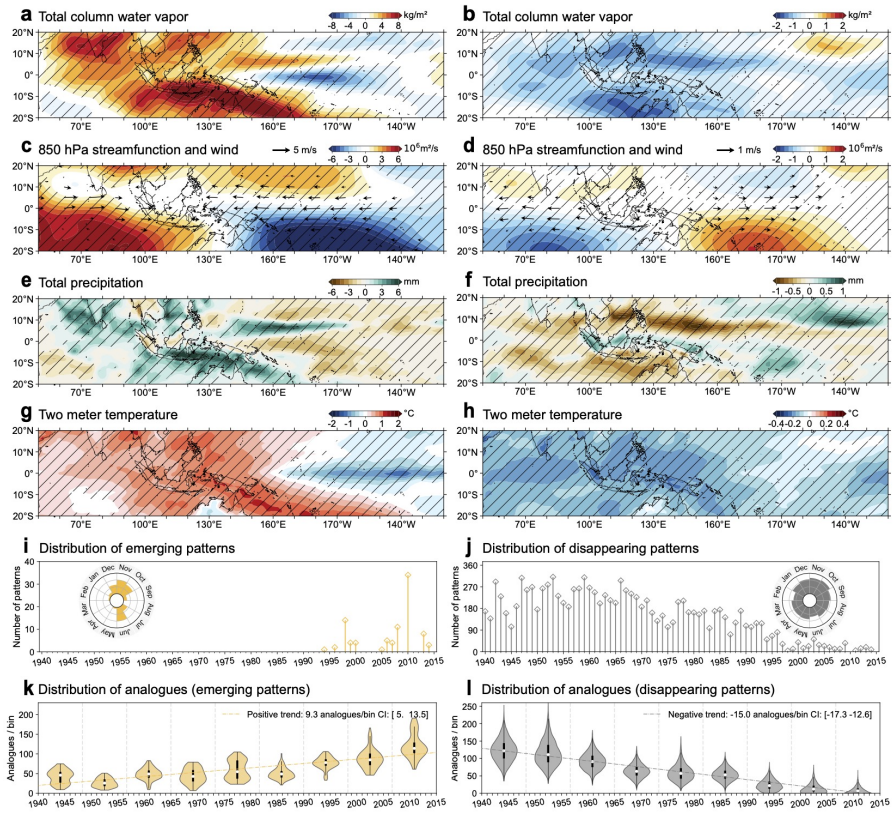

Supplementary Fig. 2: Composite anomalies (a–h), for patterns with significant occurrence trends (i,j), and associated analogues (k,l). As in Fig. 1, but for the 20CR reanalysis dataset.

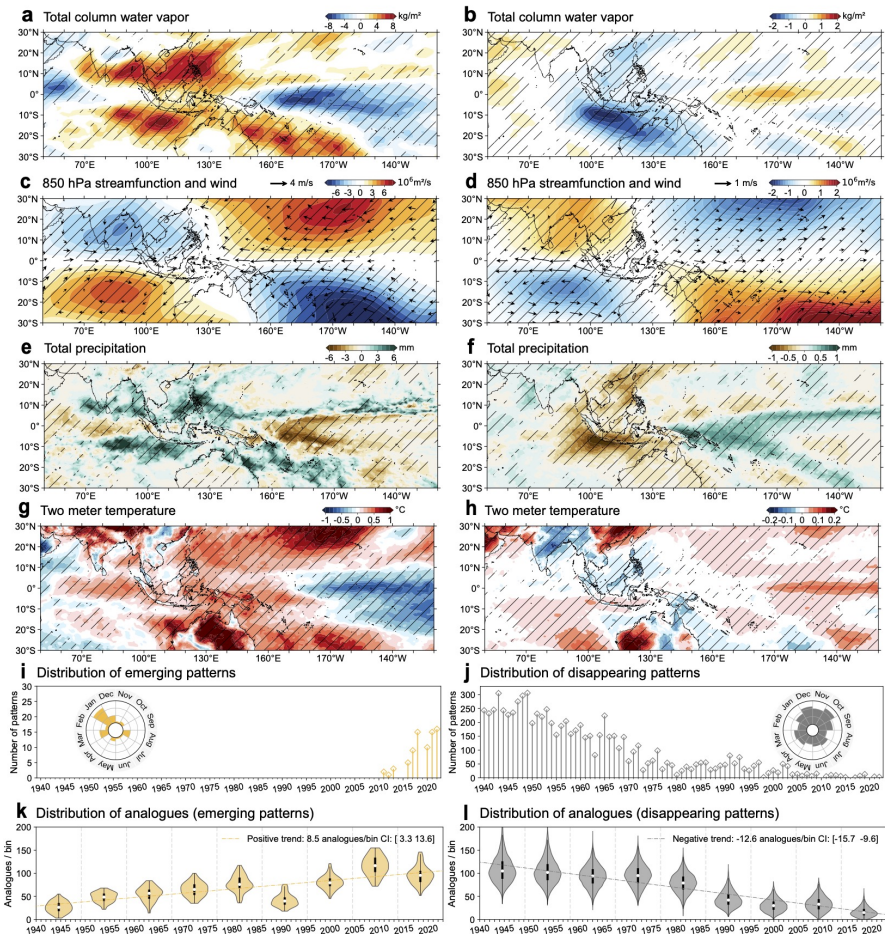

**Supplementary Fig. 3: Composite anomalies (a–h), for patterns with significant occurrence trends (i,j), and associated analogues (k,l). As in Fig. 1, but using the extended domain 30°S to 30°N.**

## 2 Frequency maps and EM-DAT results for the other three seasons: MAM, JJA, and SON

In the manuscript, we report extreme weather frequency maps for the DJF (December, January, February) season. Here, we report the results for all other seasons, namely MAM (March, April, May) – Supplementary Fig. 4, JJA

41 (June, July, August) – Supplementary Fig. 5, and SON (September, October,  
 42 ber, November) – Supplementary Fig. 6. We also report the frequency maps  
 43 for the entire year, without separating it by seasons – Supplementary Fig. 7.  
 44 These results supports the findings presented in the manuscript, highlighting  
 45 an increased frequency of extreme weather for the emerging patterns identified,  
 46 across the other three seasons.

47 In Supplementary Figs. 8, 9, and 10, we additionally show the results for  
 48 the EM-DAT analysis (same as Fig. 3 in the manuscript), for MAM, JJA, and  
 49 SON, respectively. The results are consistent with the findings obtained in the  
 50 manuscript.

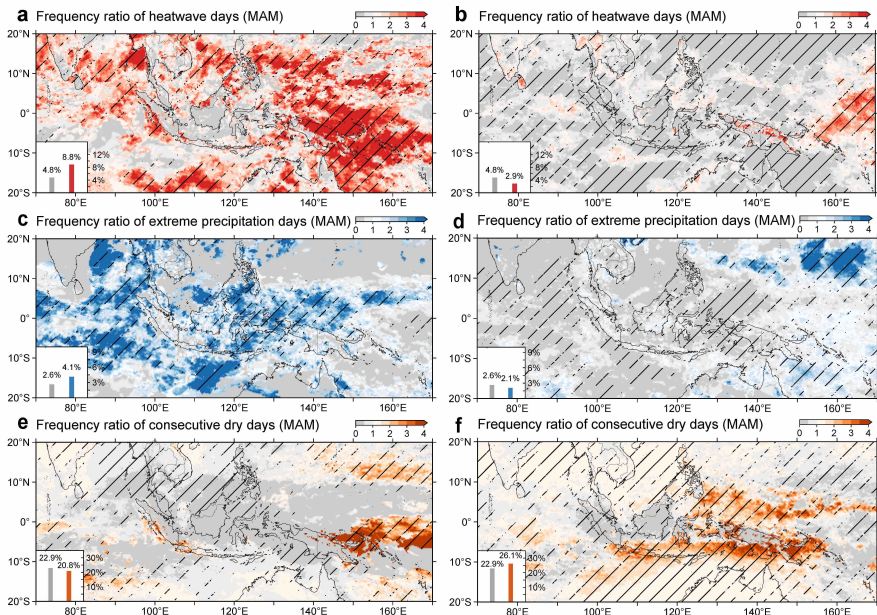

**Supplementary Fig. 4: Weather extremes associated with emerging (a,c,e) and disappearing (b,d,f) weather patterns in MAM.** Frequency ratio maps for heatwaves (a,b), extreme precipitation (c,d), and consecutive dry days (e,f). Diagonal black lines indicate regions with changes that are statistically significant at the one-sided 5% level, computed with a bootstrap sample size of 500. Same as Fig. 2, but for MAM (March-April-May).

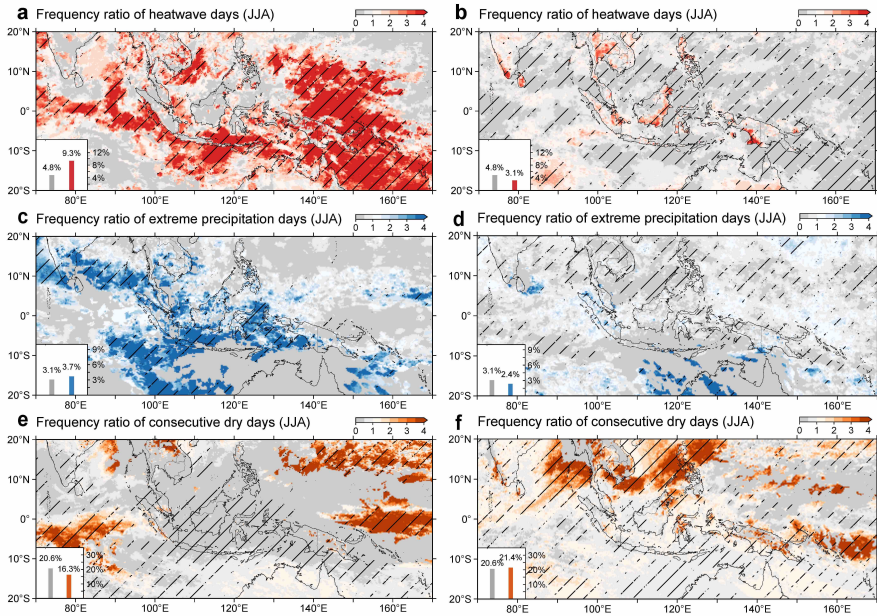

**Supplementary Fig. 5: Weather extremes associated with emerging (a,c,e) and disappearing (b,d,f) weather patterns in JJA.** Frequency ratio maps for heatwaves (a,b), extreme precipitation (c,d), and consecutive dry days (e,f). Diagonal black lines indicate regions with changes that are statistically significant at the one-sided 5% level, computed with a bootstrap sample size of 500. Same as Fig. 2, but for JJA (June-July-August).



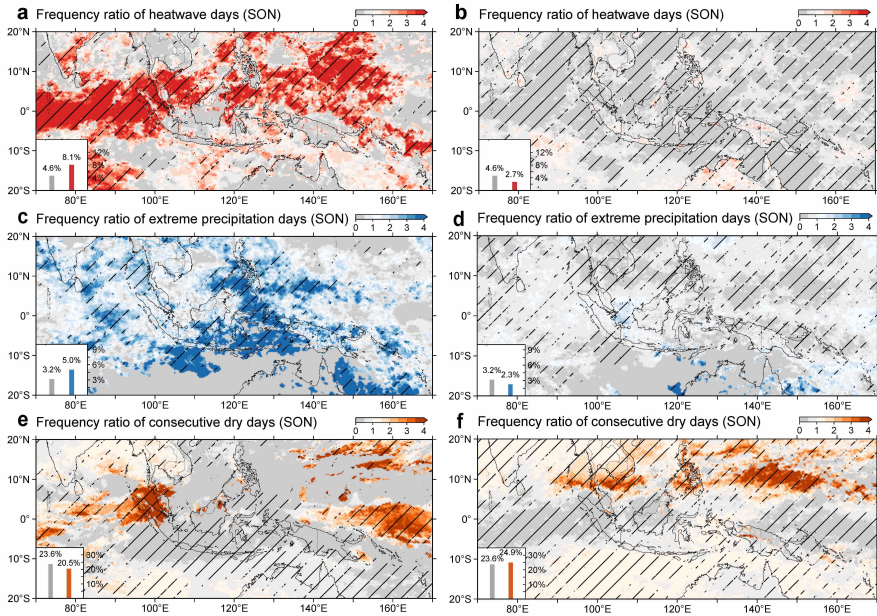

**Supplementary Fig. 6: Weather extremes associated with emerging (a,c,e) and disappearing (b,d,f) weather patterns in SON.** Frequency ratio maps for heatwaves (a,b), extreme precipitation (c,d), and consecutive dry days (e,f). Diagonal black lines indicate regions with changes that are statistically significant at the one-sided 5% level, computed with a bootstrap sample size of 500. Same as Fig. 2, but for SON (September-October-November).

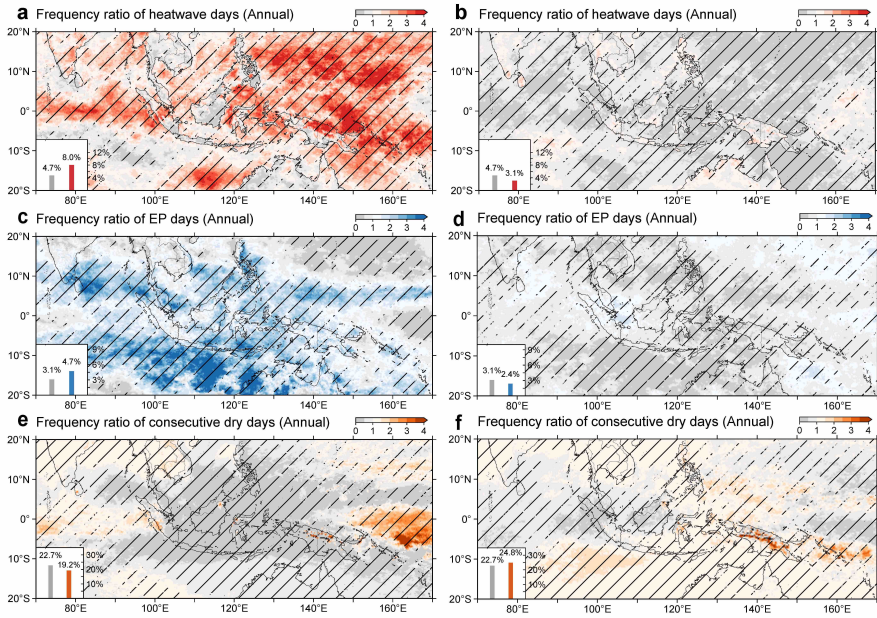

**Supplementary Fig. 7: Weather extremes associated with emerging (a,c,e) and disappearing (b,d,f) weather patterns in all seasons.** Frequency ratio maps for heatwaves (a,b), extreme precipitation (c,d), and consecutive dry days (e,f). Diagonal black lines indicate regions with changes that are statistically significant at the one-sided 5% level, computed with a bootstrap sample size of 500. Same as Fig. 2, but for all seasons.

**a** EM-DAT floods (MAM)

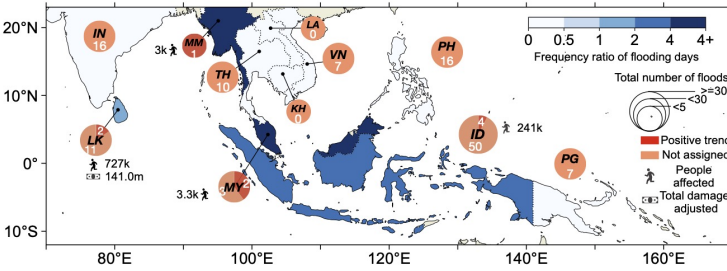

**b** Flooding days from EM-DAT (MAM)

|                          | All countries | TH        | PH        | VN        | LK        | MY        | ID         | IN        | PG        | KH | MM       | LA |
|--------------------------|---------------|-----------|-----------|-----------|-----------|-----------|------------|-----------|-----------|----|----------|----|
| Flooding Days            | 485 (12.0%)   | 49 (1.2%) | 48 (1.2%) | 25 (0.6%) | 74 (1.8%) | 23 (0.6%) | 231 (5.7%) | 80 (2.0%) | 32 (0.8%) | 0  | 7 (0.2%) | 0  |
| Flooding Days (Emerging) | 13 (23.2%)    | 0         | 0         | 0         | 2 (3.6%)  | 3 (5.4%)  | 7 (12.5%)  | 0         | 0         | 0  | 2 (3.6%) | 0  |
| Frequency Ratio          | 1.94          | 0         | 0         | 0         | 1.95      | 9.43      | 2.19       | 0         | 0         | —  | 20.65    | —  |

\*Total number of MAM days (1979-2022): 4048, Emerging patterns: 56

**Supplementary Fig. 8: Impact of emerging weather patterns over the tropical Indo-Pacific region according to floods recorded in the EM-DAT database.** The choropleth map in plot (a) depicts the ratio of flood days recorded under changing weather patterns, compared to climatology. The sizes of the pie charts represent the total floods per country from 1979-2022, with red slices representing floods linked to emerging weather patterns and orange slices for those not assigned. The table in plot (b) shows the total number of flooding days within the MAM season for each country (first row), the flood days associated with emerging weather patterns (second row), and the respective frequency ratios (third row).

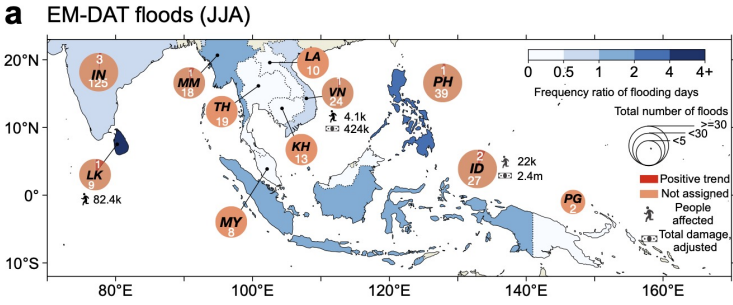

**b Flooding days from EM-DAT (JJA)**

|                          | All countries   | TH            | PH            | VN            | LK           | MY           | ID            | IN             | PG           | KH           | MM            | LA           |
|--------------------------|-----------------|---------------|---------------|---------------|--------------|--------------|---------------|----------------|--------------|--------------|---------------|--------------|
| Flooding Days            | 1235<br>(30.5%) | 128<br>(3.2%) | 164<br>(4.1%) | 132<br>(3.3%) | 43<br>(1.1%) | 29<br>(0.7%) | 105<br>(2.6%) | 675<br>(16.7%) | 2<br>(0.04%) | 98<br>(2.4%) | 130<br>(3.2%) | 62<br>(1.5%) |
| Flooding Days (Emerging) | 15<br>(37.5%)   | 0             | 4<br>(10.3%)  | 1<br>(2.6%)   | 2<br>(5.1%)  | 0            | 2<br>(5.1%)   | 5<br>(12.8%)   | 0            | 0            | 2<br>(5.1%)   | 0            |
| Frequency Ratio          | 1.26            | 0             | 2.53          | 0.79          | 4.83         | 0            | 1.98          | 0.77           | 0            | 0            | 1.60          | 0            |

\*Total number of JJA days (1979-2022): 4048, Emerging patterns: 39

**Supplementary Fig. 9: Impact of emerging weather patterns over the tropical Indo-Pacific region according to floods recorded in the EM-DAT database.** The choropleth map in plot (a) depicts the ratio of flood days recorded under changing weather patterns, compared to climatology. The sizes of the pie charts represent the total floods per country from 1979-2022, with red slices representing floods linked to emerging weather patterns and orange slices for those not assigned. The table in plot (b) shows the total number of flooding days within the JJA season for each country (first row), the flood days associated with emerging weather patterns (second row), and the respective frequency ratios (third row).

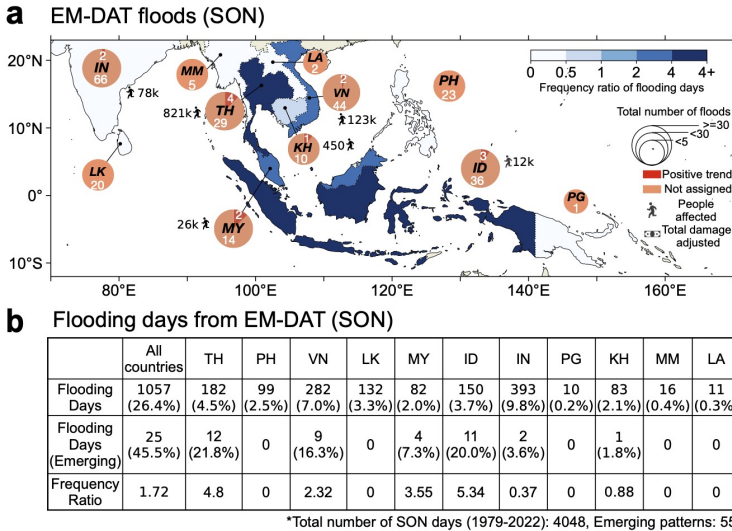

**Supplementary Fig. 10: Impact of emerging weather patterns over the tropical Indo-Pacific region according to floods recorded in the EM-DAT database.** The choropleth map in plot (a) depicts the ratio of flood days recorded under changing weather patterns, compared to climatology. The sizes of the pie charts represent the total floods per country from 1979-2022, with red slices representing floods linked to emerging weather patterns and orange slices for those not assigned. The table in plot (b) shows the total number of flooding days within the SON season for each country (first row), the flood days associated with emerging weather patterns (second row), and the respective frequency ratios (third row).

### 51 **3 Role of variability on weather extremes for the three** 52 **other seasons: MAM, JJA, and SON**

53 In the manuscript, we use pie charts to understand the role of internal variability  
54 for the DJF (December, January, February) season, where we focused on  
55 ENSO. Here, we report the results for all other seasons, namely MAM (March,  
56 April, May) – Supplementary Fig. 11, JJA (June, July, August) – Supple-  
57 mentary Fig. 12, and SON (September, October, November) – Supplementary  
58 Fig. 13. These results support the findings presented in the manuscript,

59 (related to Fig. 4), and highlight a substantial contribution of the emerging  
 60 patterns identified to extreme weather conditions in the region.

61 **3.1 ENSO-driven variability**

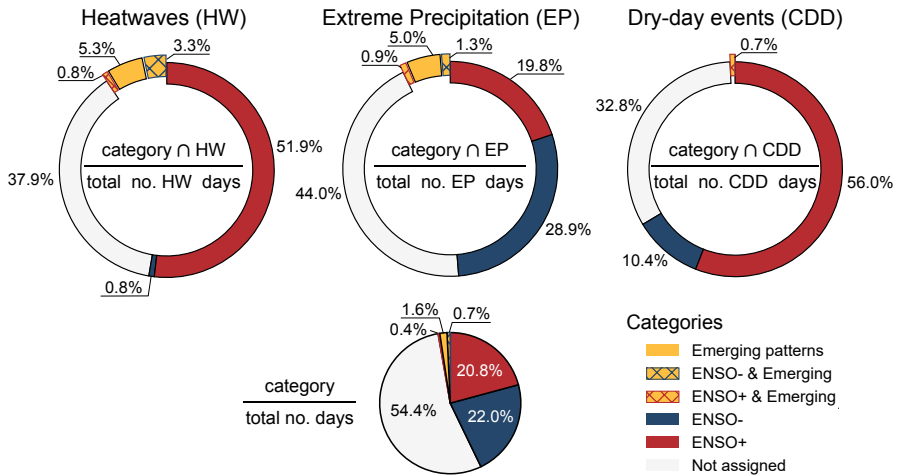

**Supplementary Fig. 11: Comparative analysis of extreme weather across ENSO phases and emerging patterns in MAM. As in Fig. 4 but for MAM.**

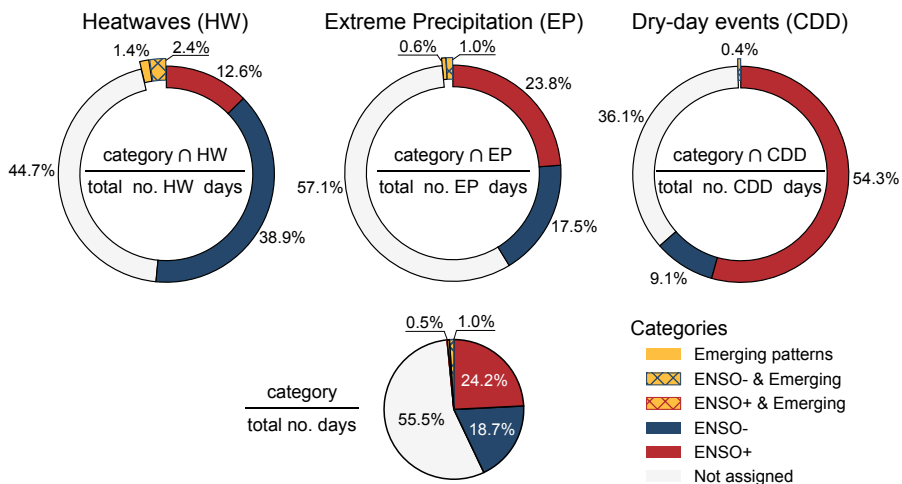

**Supplementary Fig. 12: Comparative analysis of extreme weather across ENSO phases and emerging patterns in JJA.** As in Fig. 4 but for JJA.

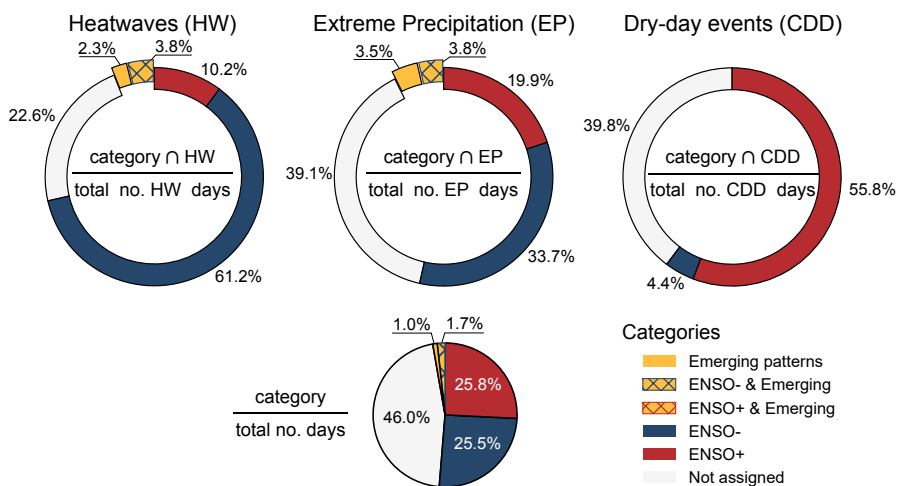

**Supplementary Fig. 13: Comparative analysis of extreme weather across ENSO phases and emerging patterns in SON.** As in Fig. 4 but for SON.

62 **3.2 IOD-driven variability**

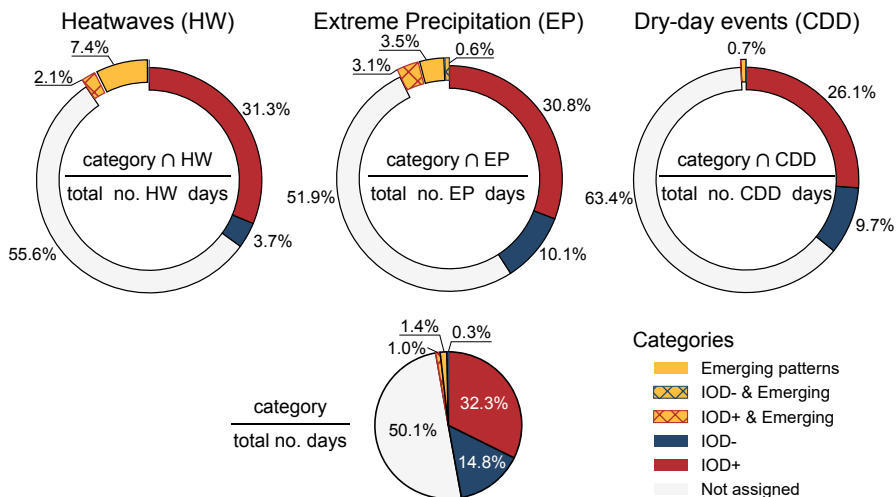

**Supplementary Fig. 14: Comparative analysis of extreme weather across IOD phases and emerging patterns in MAM. As in Fig. 4 but for IOD, in MAM.**

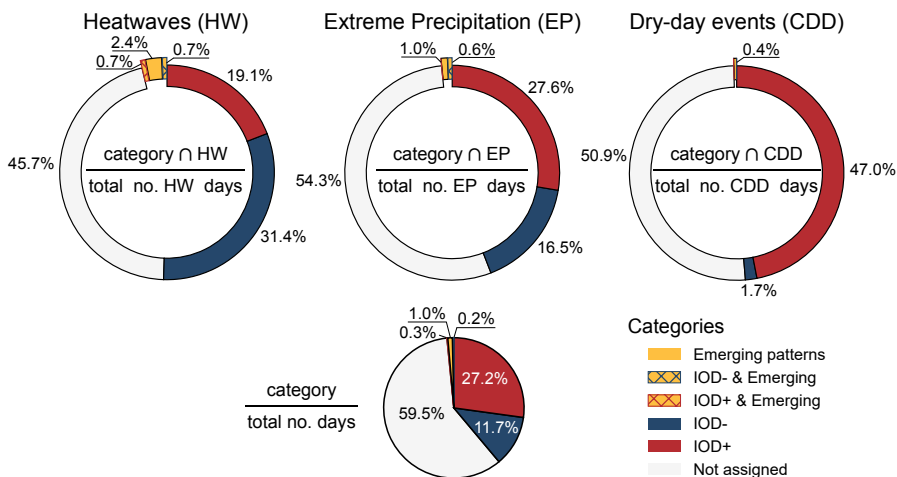

**Supplementary Fig. 15: Comparative analysis of extreme weather across IOD phases and emerging patterns in JJA. As in Fig. 4 but for IOD, in JJA.**



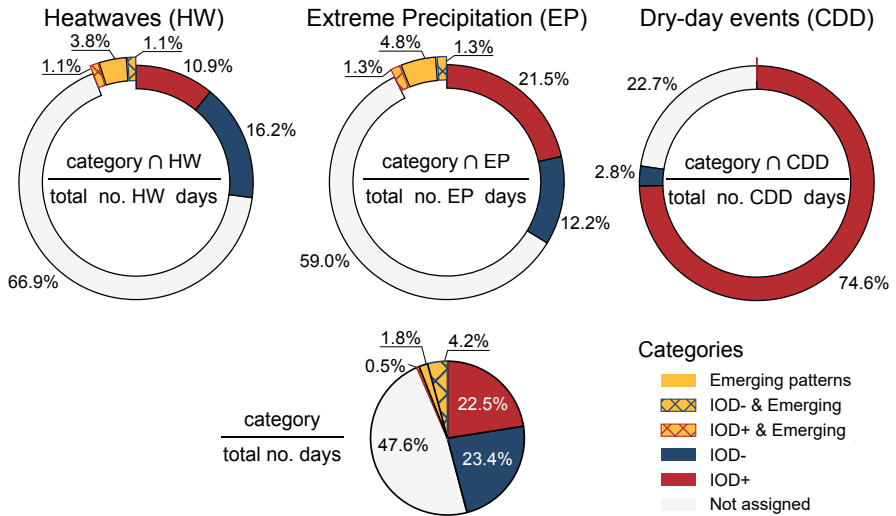

Supplementary Fig. 16: Comparative analysis of extreme weather across IOD phases and emerging patterns in SON. As in Fig. 4 but for IOD, in SON.

63 **3.3 PDO-driven variability**

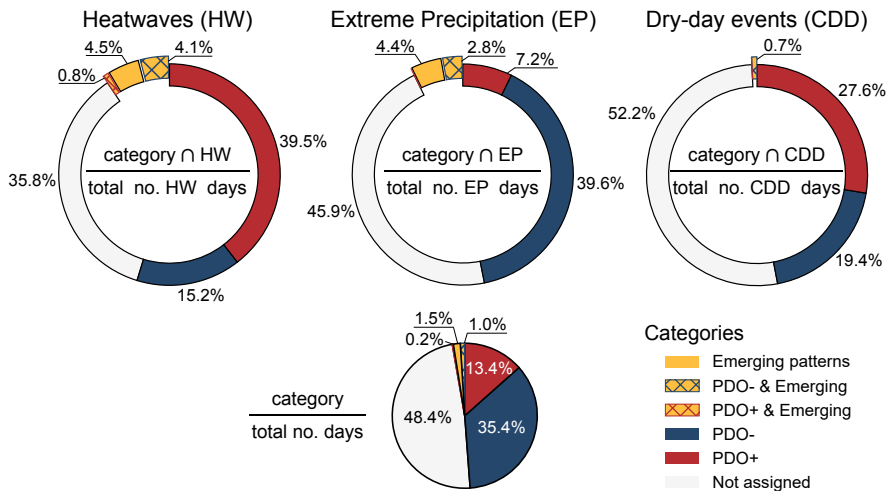

Supplementary Fig. 17: Comparative analysis of extreme weather across PDO phases and emerging patterns in MAM. As in Fig. 4 but for PDO, in MAM.

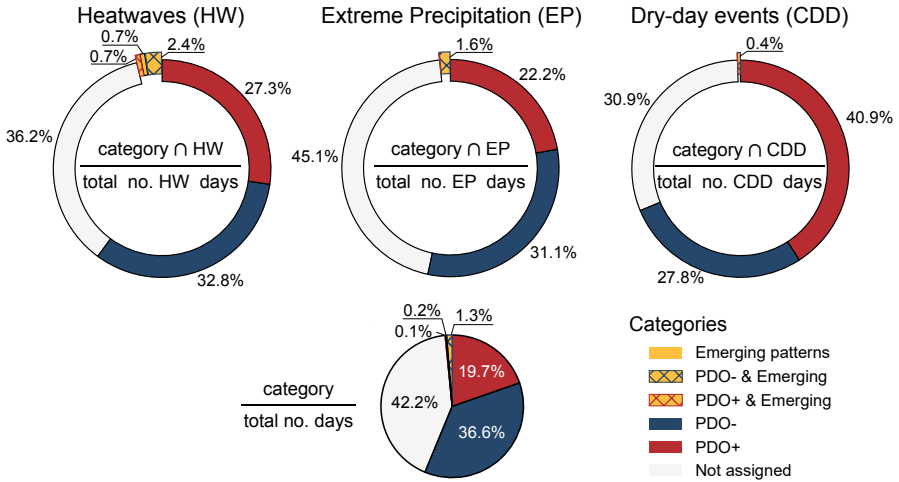

**Supplementary Fig. 18: Comparative analysis of extreme weather across PDO phases and emerging patterns in JJA.** As in Fig. 4 but for PDO, in JJA.

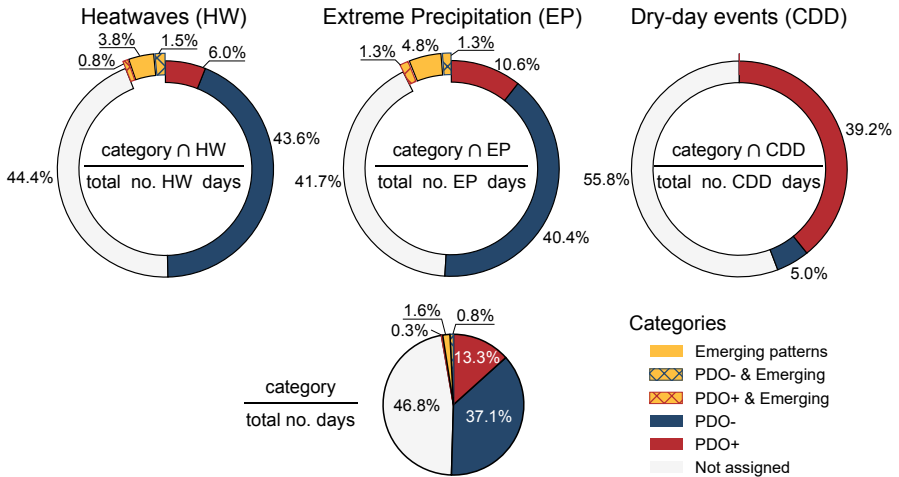

**Supplementary Fig. 19: Comparative analysis of extreme weather across PDO phases and emerging patterns in SON.** As in Fig. 4 but for PDO, in SON.

64 **3.4 AMO-driven variability**

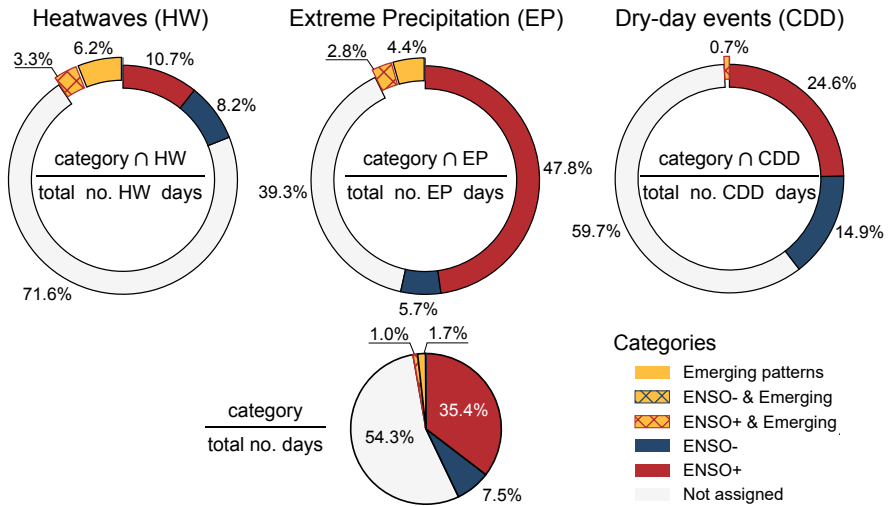

**Supplementary Fig. 20: Comparative analysis of extreme weather across AMO phases and emerging patterns in MAM. As in Fig. 4 but for AMO, in MAM.**

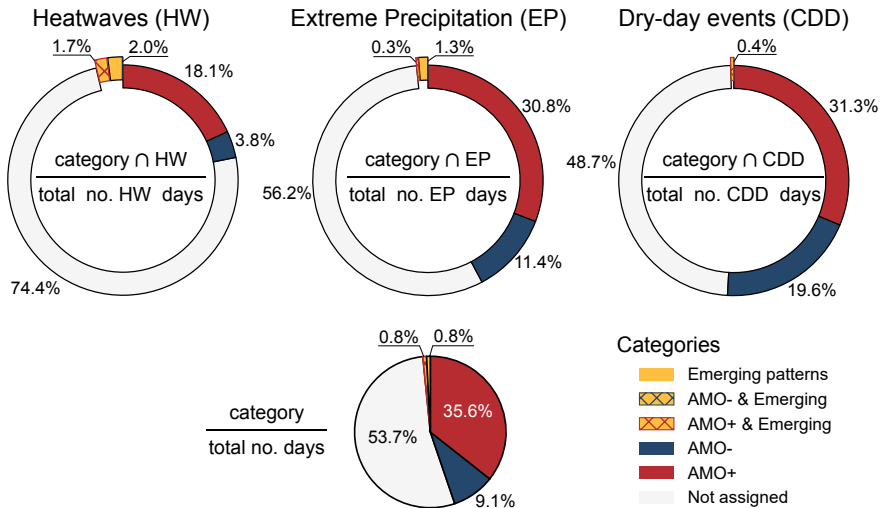

**Supplementary Fig. 21: Comparative analysis of extreme weather across AMO phases and emerging patterns in JJA. As in Fig. 4 but for AMO, in JJA.**

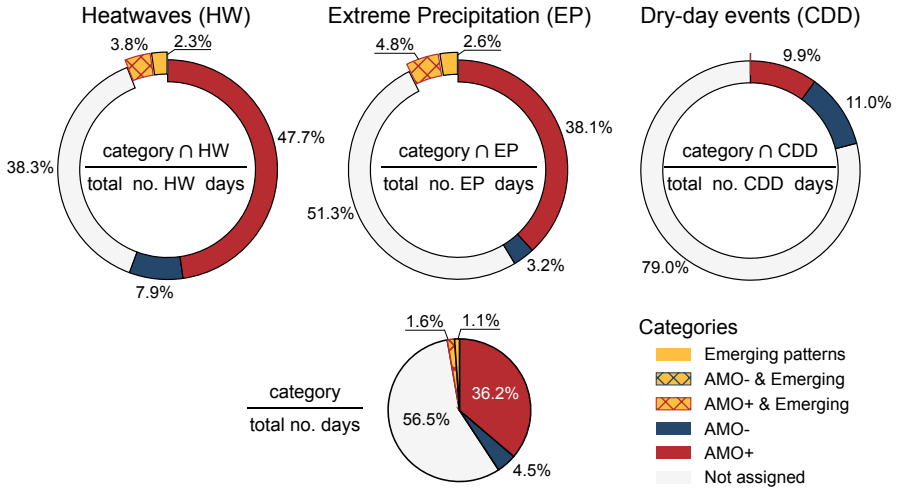

**Supplementary Fig. 22: Comparative analysis of extreme weather across AMO phases and emerging patterns in SON.** As in Fig. 4 but for AMO, in SON.

#### 4 Distribution of identified patterns with respect to modes of variability

In this section, we present violin plots showing the distribution of both emerging and disappearing patterns with respect to the modes of variability considered, namely ENSO, IOD, PDO, and AMO. We present two figures. The first, figure 23, uses quantile-based thresholds for identifying positive, negative, and neutral phases of each mode of variability. This approach is used in a number of papers in the literature [1–3]. This approach is used to obtain the frequency maps in Supplementary Information section 5. The second, figure 24, uses absolute thresholds for identifying positive, negative, and neutral phases of each mode of variability. This approach is used in a number of papers in the literature [4–6].

For the quantile-based threshold approach (Supplementary Fig. 23), we note that that the mean value (dot in the violin plots) for all data (white),

79 emerging patterns (yellow violin plot) and disappearing patterns (grey violin  
80 plot) is mostly in the neutral phase of each mode, except for the emerging  
81 patterns vs AMO. In this case, the emerging patterns are slightly above the  
82 threshold, that indicates weak positive AMO conditions.

83 For the absolute threshold approach (Supplementary Fig. 24), we note that  
84 that the mean value (dot in the violin plots) for all data (white), emerging  
85 patterns (yellow violin plot) and disappearing patterns (grey violin plot) is  
86 mostly in the neutral phase of each mode, except for the emerging patterns  
87 vs ENSO. In this case, the emerging patterns are slightly below the threshold,  
88 that indicates weak La Niña conditions.

89 Remarkably, if we condition extreme weather with respect to mode of  
90 variability phases obtained using quantile-based thresholds, as done in Supple-  
91 mentary Information section 5, we are unable to reproduce increased frequency  
92 of extremes as high as the one obtained for the emerging patterns identified in  
93 this work. This indicates that the variability mode phase, while it contributes  
94 to modulating extreme weather, it is unable to fully explain the increased  
95 frequency seen for the emerging patterns. Hence, emerging patterns and the  
96 changing dynamics of the tropical Indo-Pacific are playing a key role.

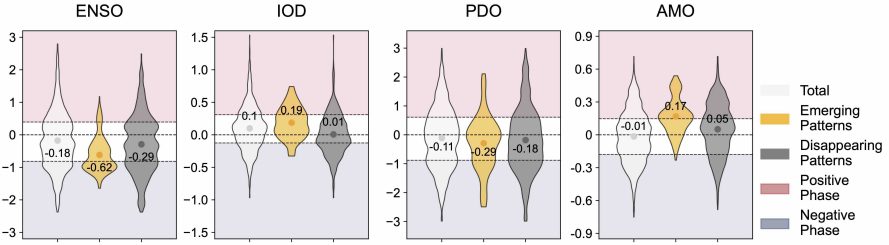

**Supplementary Fig. 23: Violin plots showing patterns vs modes of variability phases using quantile-based thresholds.** The shaded red and blue areas indicate positive and negative phase of each mode of variability obtained using the quantile-based thresholds, while the white area indicate neutral phase. The three violin plots correspond to all data available (white), to the emerging patterns (yellow), and to the disappearing patterns (grey). The dot in each violin plot corresponds to the mean value.

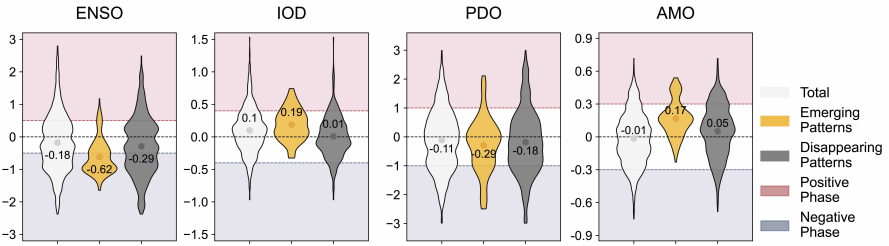

**Supplementary Fig. 24: Violin plots showing patterns vs modes of variability phases using absolute thresholds.** The shaded red and blue areas indicate positive and negative phase of each mode of variability obtained using absolute thresholds, while the white area indicate neutral phase. The three violin plots correspond to all data available (white), to the emerging patterns (yellow), and to the disappearing patterns (grey). The dot in each violin plot corresponds to the mean value.

## 97 5 Frequency maps conditioned to modes of variability

98 In this section, we present the frequency ratio maps, identical to Fig. 2 in the  
 99 main manuscript, but obtained conditioning extremes with respect to mode of  
 100 variability phases computed using the quantile-based thresholds presented in  
 101 Supplementary Fig. 23. Remarkably, all the results presented in this section

102 are unable to reproduce an increased frequency of heatwaves and extreme pre-  
103 cipitation as significant the one obtained for the emerging patterns identified  
104 in this work.

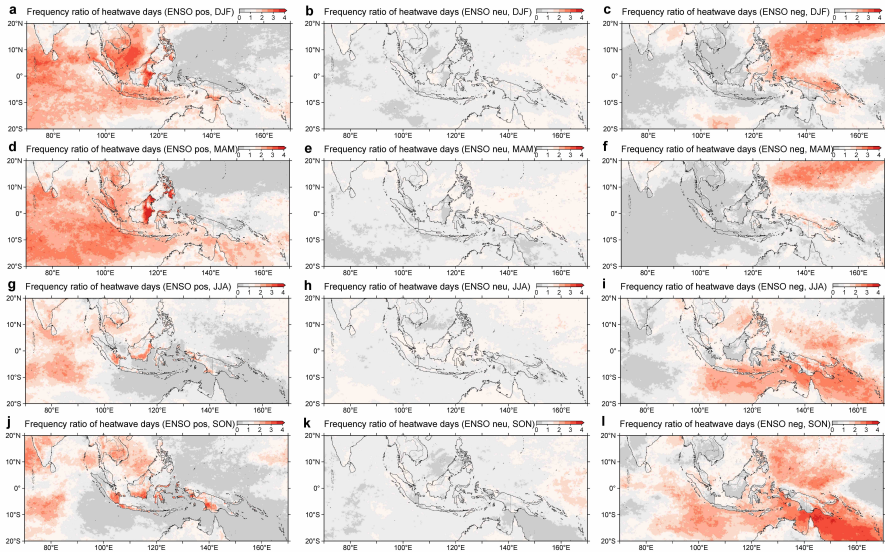

**Supplementary Fig. 25: Frequency ratio maps of heatwaves conditioned to different ENSO phases.** The positive, negative and neutral phases were obtained using the quantile-based thresholds presented in Supplementary Information section 4.

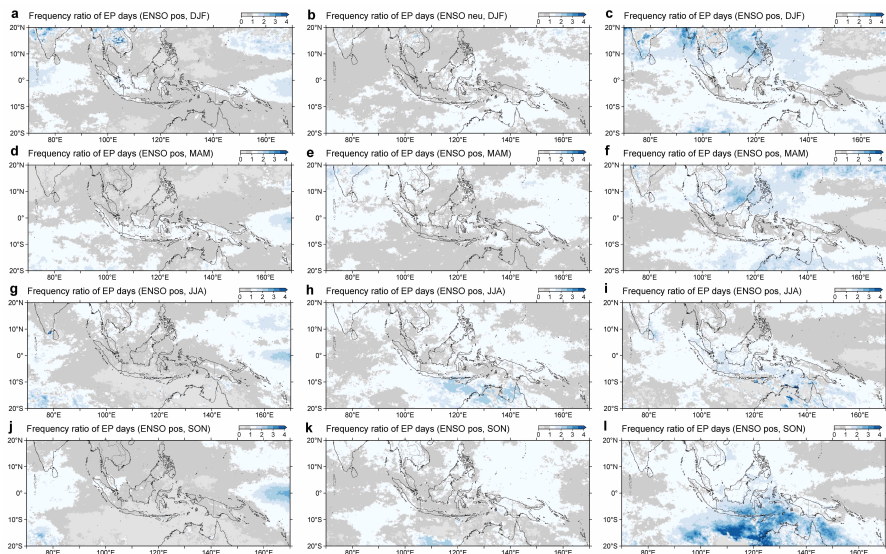

**Supplementary Fig. 26: Frequency ratio maps of extreme precipitation conditioned to different ENSO phases.** The positive, negative and neutral phases were obtained using the quantile-based thresholds presented in Supplementary Information section 4.



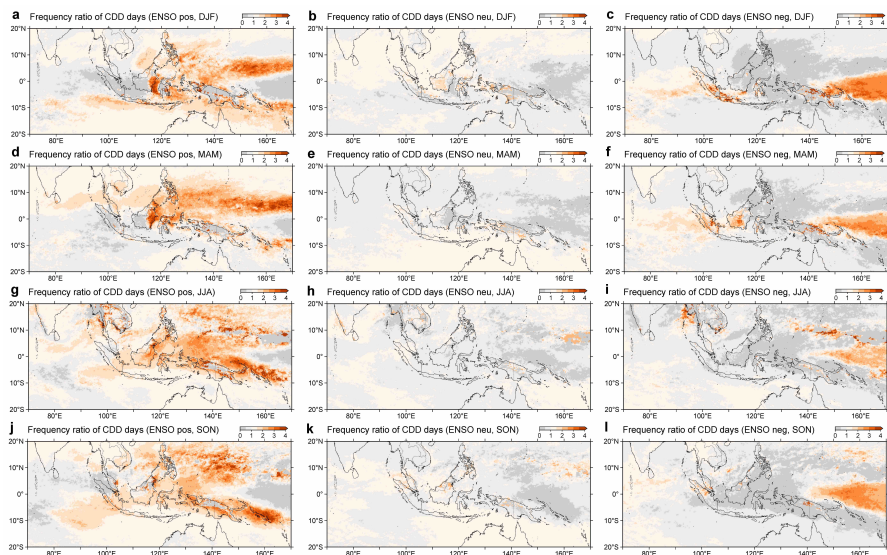

**Supplementary Fig. 27: Frequency ratio maps of consecutive dry days conditioned to different ENSO phases.** The positive, negative and neutral phases were obtained using the quantile-based thresholds presented in Supplementary Information section 4.

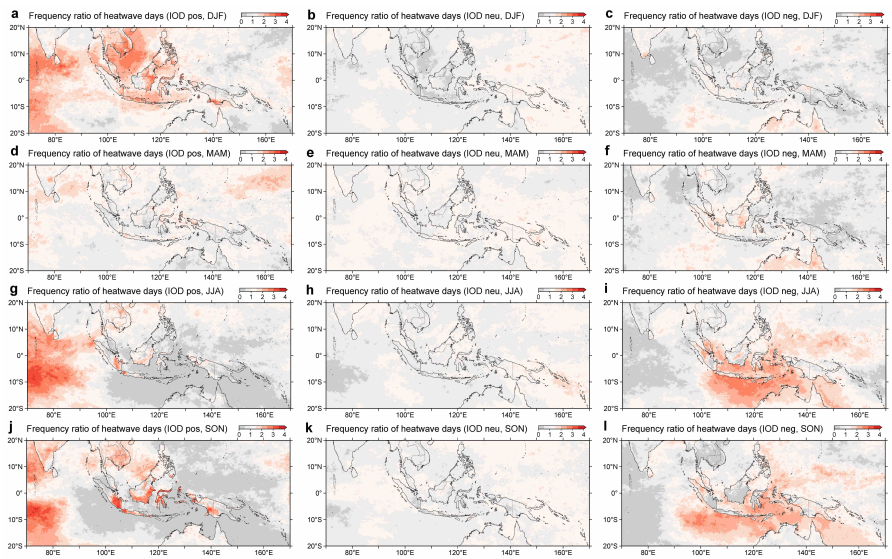

**Supplementary Fig. 28: Frequency ratio maps of heatwaves conditioned to different IOD phases.** The positive, negative and neutral phases were obtained using the quantile-based thresholds presented in Supplementary Information section 4.

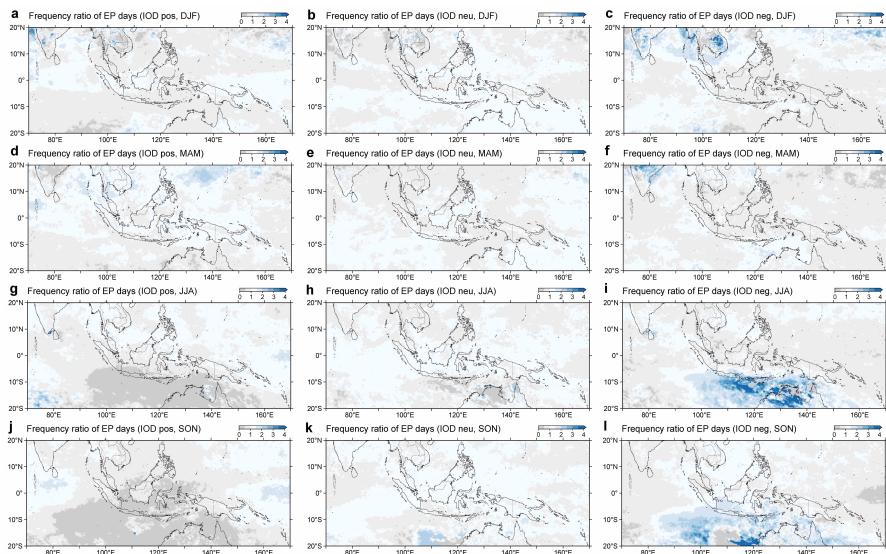

**Supplementary Fig. 29: Frequency ratio maps of extreme precipitation conditioned to different IOD phases.** The positive, negative and neutral phases were obtained using the quantile-based thresholds presented in Supplementary Information section 4.

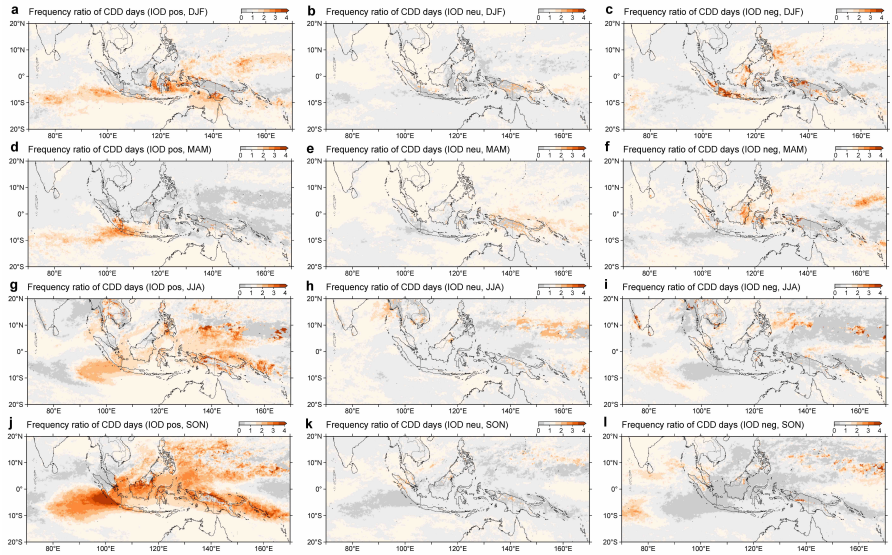

**Supplementary Fig. 30: Frequency ratio maps of consecutive dry days conditioned to different IOD phases.** The positive, negative and neutral phases were obtained using the quantile-based thresholds presented in Supplementary Information section 4.

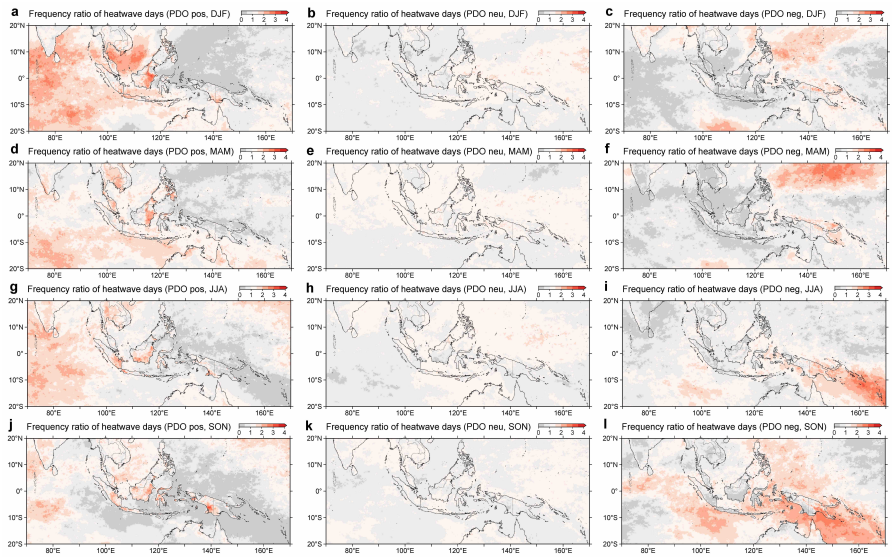

**Supplementary Fig. 31: Frequency ratio maps of heatwaves conditioned to different PDO phases.** The positive, negative and neutral phases were obtained using the quantile-based thresholds presented in Supplementary Information section 4.

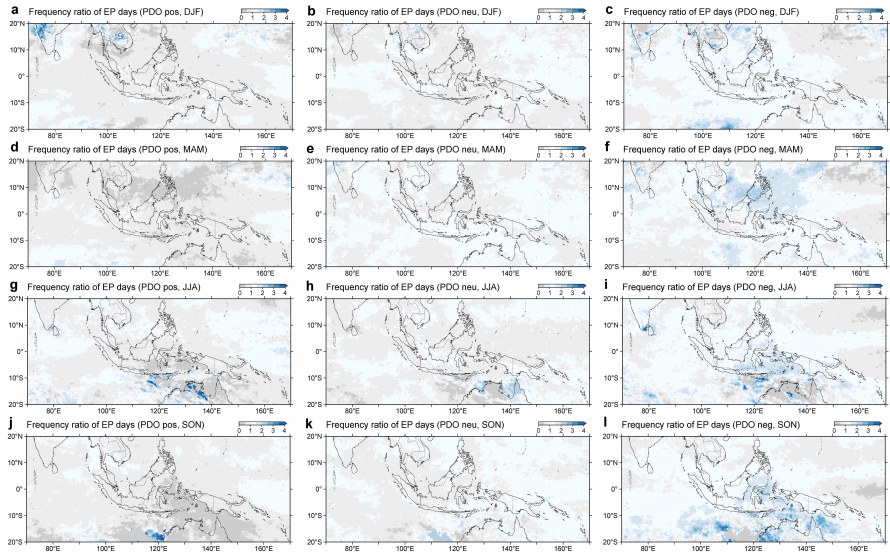

**Supplementary Fig. 32: Frequency ratio maps of extreme precipitation conditioned to different PDO phases.** The positive, negative and neutral phases were obtained using the quantile-based thresholds presented in Supplementary Information section 4.

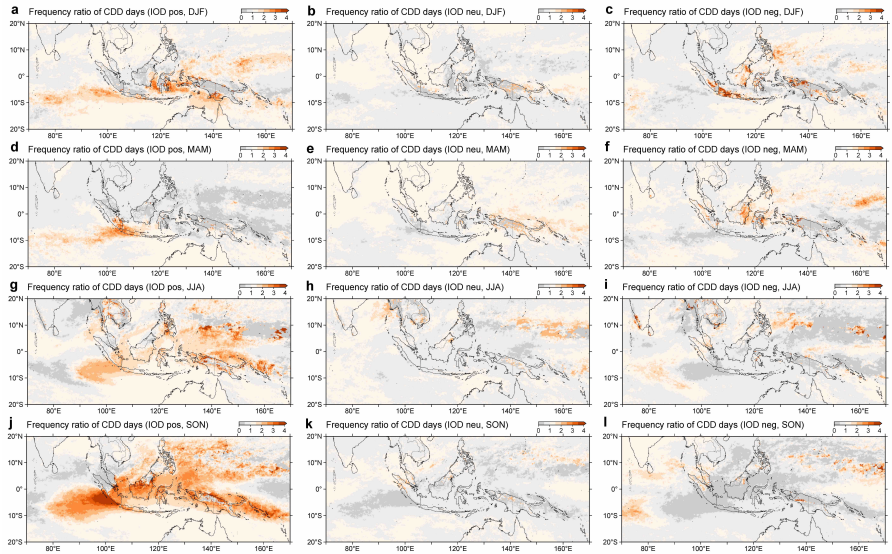

**Supplementary Fig. 33: Frequency ratio maps of consecutive dry days conditioned to different PDO phases.** The positive, negative and neutral phases were obtained using the quantile-based thresholds presented in Supplementary Information section 4.

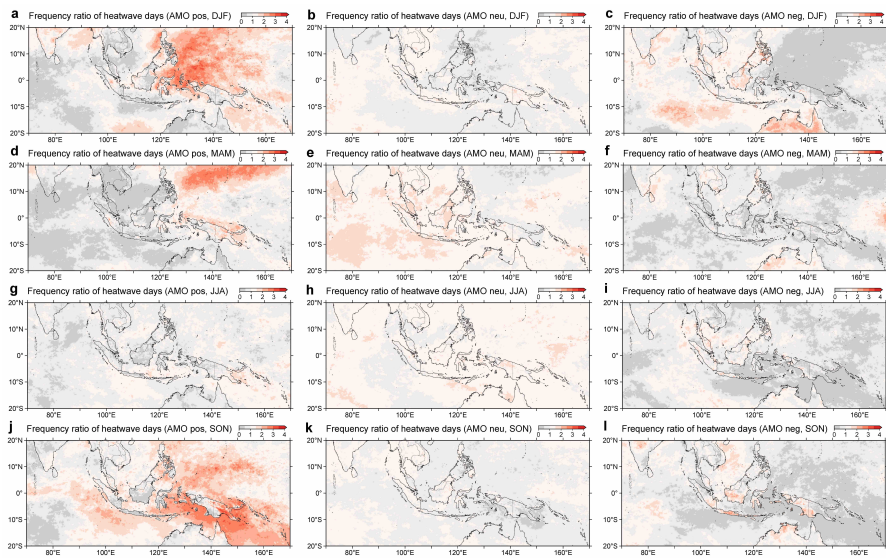

**Supplementary Fig. 34: Frequency ratio maps of heatwaves conditioned to different AMO phases.** The positive, negative and neutral phases were obtained using the quantile-based thresholds presented in Supplementary Information section 4.



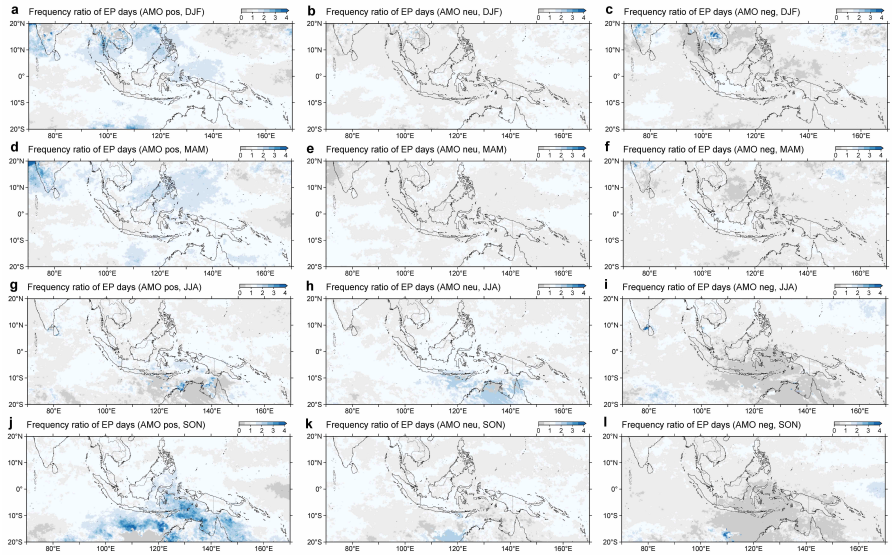

**Supplementary Fig. 35: Frequency ratio maps of extreme precipitation conditioned to different AMO phases.** The positive, negative and neutral phases were obtained using the quantile-based thresholds presented in Supplementary Information section 4.

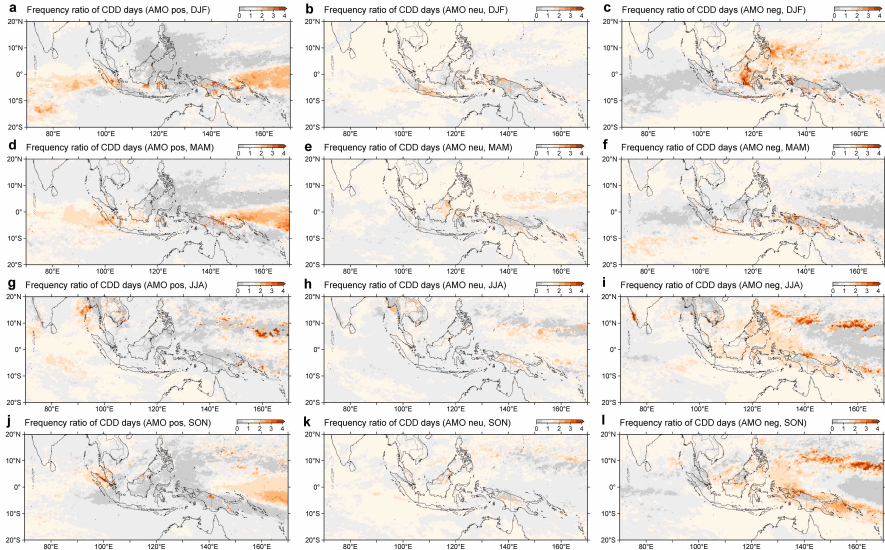

**Supplementary Fig. 36: Frequency ratio maps of consecutive dry days conditioned to different AMO phases.** The positive, negative and neutral phases were obtained using the quantile-based thresholds presented in Supplementary Information section 4.

105 **6 Regional impacts of weather extremes associated**  
 106 **with emerging weather patterns**

107 In the manuscript, we analyzed weather extremes defined over the entire  
 108 region, including both land and ocean. We found that the emerging weather  
 109 patterns are favoring the occurrence of heatwaves and extreme precipitation  
 110 events in this region. Thus, we apply various regional masks to better under-  
 111 stand the local impacts brought by the identified emerging weather patterns.  
 112 In addition to the entire region, land-only and ocean-only masks, we divided  
 113 the land into 8 different regions as shown in Supplementary Fig. 37.

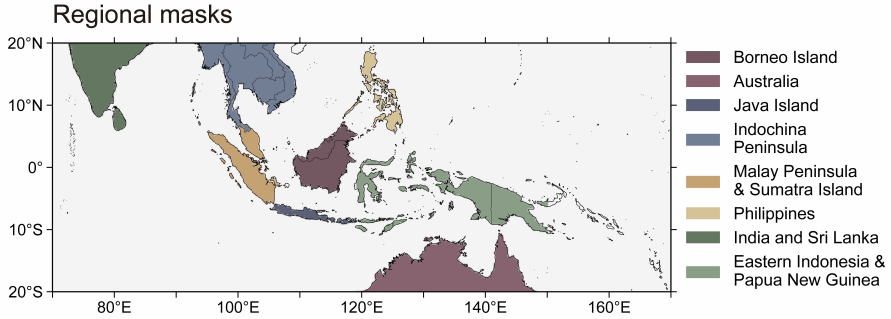

**Supplementary Fig. 37: Regional masks that are used in this study.**

114 For each given region, we first define local extremes following the same  
 115 method described in the main text. Specifically, extreme events are identified  
 116 as days when the number of grid points classified as extremes exceeds the top  
 117 10th percentile. We count the number of extreme events that are associated  
 118 with emerging weather patterns and display them as the first value in each  
 119 cell in Supplementary Tabs. 1 and 2. We additionally compute the frequency  
 120 ratio between emerging weather patterns and climatology, showing them in  
 121 parenthesis in the Supplementary Tabs. 1 and 2. The results further confirm  
 122 that emerging weather patterns are bringing more heatwaves and extreme  
 123 precipitation events and less dry-day events to the region in general, despite  
 124 some regional and seasonal uncertainties.

## 125 7 Example of weather pattern and associated extreme

126 In our study, 'weather patterns' refer to specific synoptic configurations  
 127 over the tropical Indo-Pacific region. More specifically, they are defined as  
 128 daily mean fields of certain observables, such as Total Column Water Vapor  
 129 (TCWV) and the 850hPa streamfunction. These patterns hold crucial infor-  
 130 mation for the weather over the region and are linked to weather extremes,

| Region              | Extremes              | DJF          | MAM          | JJA          | SON          |
|---------------------|-----------------------|--------------|--------------|--------------|--------------|
| Entire region       | Heatwave              | 33<br>(2.54) | 23<br>(4.11) | 16<br>(4.10) | 16<br>(2.90) |
|                     | Extreme precipitation | 42<br>(3.24) | 23<br>(4.11) | 5<br>(1.28)  | 23<br>(4.18) |
|                     | Dry-day event         | 0<br>(0.00)  | 1<br>(0.18)  | 1<br>(0.26)  | 0<br>(0.00)  |
| Land                | Heatwave              | 7<br>(0.54)  | 10<br>(1.78) | 8<br>(2.05)  | 3<br>(0.54)  |
|                     | Extreme precipitation | 33<br>(2.55) | 16<br>(2.86) | 10<br>(2.56) | 18<br>(3.30) |
|                     | Dry-day event         | 1<br>(0.08)  | 0<br>(0.00)  | 0<br>(0.00)  | 0<br>(0.00)  |
| Ocean               | Heatwave              | 35<br>(2.69) | 23<br>(4.11) | 16<br>(4.10) | 16<br>(2.91) |
|                     | Extreme precipitation | 43<br>(3.26) | 23<br>(4.11) | 4<br>(1.03)  | 23<br>(4.18) |
|                     | Dry-day event         | 0<br>(0.08)  | 1<br>(0.18)  | 1<br>(0.26)  | 0<br>(0.00)  |
| Indochina Peninsula | Heatwave              | 7<br>(0.54)  | 9<br>(1.61)  | 6<br>(1.54)  | 1<br>(0.18)  |
|                     | Extreme precipitation | 41<br>(3.25) | 11<br>(1.97) | 3<br>(0.77)  | 8<br>(1.46)  |
|                     | Dry-day event         | 1<br>(0.08)  | 1<br>(0.18)  | 3<br>(0.80)  | 5<br>(0.91)  |
| India and LK        | Heatwave              | 20<br>(1.54) | 10<br>(1.78) | 1<br>(0.26)  | 10<br>(1.82) |
|                     | Extreme precipitation | 37<br>(2.86) | 2<br>(0.36)  | 10<br>(2.56) | 9<br>(1.64)  |
|                     | Dry-day event         | 13<br>(1.01) | 2<br>(0.36)  | 1<br>(0.26)  | 6<br>(1.09)  |

**Supplementary Tab. 1:** Regional impacts of weather extremes

131 including heatwaves, extreme precipitation events, and consecutive dry condi-  
132 tions. In Fig. 38 (a), we show an example of TCWV anomaly field, namely  
133 the weather pattern, at 2013/06/20. The spatial distribution of three dif-  
134 ferent types of extremes at that day is shown in Fig. 38 (b, c, d), with a  
135 value of 1 indicating the occurrence of extremes and 0 denoting neutral con-  
136 ditions. We observe that Sumatra Island, Borneo Island, and the surrounding  
137 regions are experiencing hotter and drier conditions, primarily due to the lack

| Region                      | Extremes              | DJF          | MAM          | JJA          | SON          |
|-----------------------------|-----------------------|--------------|--------------|--------------|--------------|
| Australia                   | Heatwave              | 2<br>(0.15)  | 14<br>(2.50) | 8<br>(2.06)  | 0<br>(0.00)  |
|                             | Extreme precipitation | 18<br>(1.39) | 5<br>(0.90)  | 1<br>(0.74)  | 12<br>(2.27) |
|                             | Dry-day event         | 3<br>(0.23)  | 0<br>(0.00)  | 0<br>(0.00)  | 0<br>(0.00)  |
| Borneo Island               | Heatwave              | 20<br>(1.54) | 4<br>(0.71)  | 6<br>(1.55)  | 5<br>(0.91)  |
|                             | Extreme precipitation | 20<br>(1.54) | 13<br>(2.34) | 10<br>(2.58) | 11<br>(2.00) |
|                             | Dry-day event         | 0<br>(0.00)  | 0<br>(0.00)  | 0<br>(0.00)  | 0<br>(0.00)  |
| Java Island                 | Heatwave              | 5<br>(0.39)  | 5<br>(0.90)  | 6<br>(1.57)  | 1<br>(0.18)  |
|                             | Extreme precipitation | 17<br>(1.31) | 8<br>(1.49)  | 12<br>(3.38) | 14<br>(2.57) |
|                             | Dry-day event         | 6<br>(0.48)  | 6<br>(1.08)  | 0<br>(0)     | 0<br>(0)     |
| Malay Peninsula and Sumatra | Heatwave              | 20<br>(1.55) | 6<br>(1.08)  | 0<br>(0.00)  | 10<br>(1.8)  |
|                             | Extreme precipitation | 23<br>(1.78) | 9<br>(1.63)  | 9<br>(2.53)  | 14<br>(2.59) |
|                             | Dry-day event         | 3<br>(0.23)  | 1<br>(0.18)  | 0<br>(0.00)  | 7<br>(1.28)  |
| Philippines                 | Heatwave              | 12<br>(0.93) | 4<br>(0.72)  | 3<br>(0.77)  | 5<br>(0.92)  |
|                             | Extreme precipitation | 30<br>(2.33) | 12<br>(2.22) | 4<br>(1.05)  | 17<br>(3.14) |
|                             | Dry-day event         | 0<br>(0.00)  | 1<br>(0.18)  | 0<br>(0.00)  | 0<br>(0.00)  |
| Eastern Indonesia and PG    | Heatwave              | 16<br>(1.24) | 21<br>(3.75) | 11<br>(2.85) | 4<br>(0.73)  |
|                             | Extreme precipitation | 24<br>(1.86) | 10<br>(1.80) | 6<br>(1.54)  | 13<br>(2.36) |
|                             | Dry-day event         | 5<br>(0.40)  | 0<br>(0.00)  | 1<br>(0.26)  | 0<br>(0.00)  |

**Supplementary Tab. 2:** Regional impacts of weather extremes

138 of water vapor in the atmosphere. Additionally, we noted extreme precipita-  
139 tion occurring to the west of the Philippines; this is attributed to a tropical  
140 depression

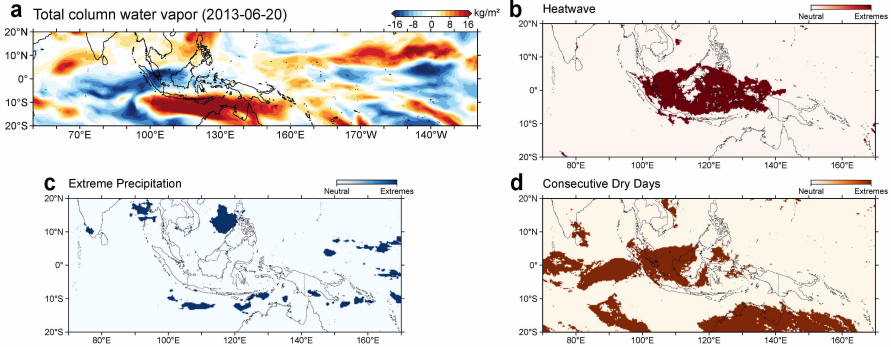

**Supplementary Fig. 38: Example of weather pattern at 2013/06/20 and associated extreme.** Daily total column water vapor anomaly at 2013/06/20 (a), and associated spatial distribution of heatwaves (b), extreme precipitation (c), and consecutive dry days (d). Grid points that are identified experiencing extremes are colored, while the others are not.

## 141 8 Importance of the study and competing work

142 In this last section of Supplementary Material, we detail some additional points  
 143 explaining the importance of understanding changes in atmospheric weather  
 144 patterns in the tropical Indo-Pacific region, and highlight existing competing  
 145 work.

### 146 8.1 Importance of Indo-Pacific climate and ongoing debates

147 The Indo-Pacific region encompasses the tropical Pacific Ocean and the Indian  
 148 Ocean. Because of this confluence, the weather of this region is modulated by  
 149 the complex interaction of multiple climate drivers, including El Niño Southern  
 150 Oscillation (ENSO) [7, 8], the Indian Ocean Dipole (IOD) [9, 10], the Madden  
 151 Julian Oscillation (MJO) [11–13], and seasonal monsoons [14, 15], among oth-  
 152 ers. These climate drivers, and their interplay with the tropical Indo-Pacific  
 153 weather have far-reaching implications, and lead to weather modulation and  
 154 extreme weather events in other regions of the planet [16–18].

155 The characterization of changes in atmospheric circulation patterns of the  
156 tropical Indo-Pacific region along with their causes have drawn the attention  
157 of several research groups worldwide. While some consensus has been reached,  
158 many results remain inconclusive, fueling uncertainty on future weather pat-  
159 terns, and especially weather extremes in the region. Atmospheric circulation  
160 patterns may be understood as a set of spatial patterns of a given atmospheric  
161 variable which repeatedly occur in conjunction with specific classes of weather  
162 patterns and extreme weather events.

163 One of the most prominent features in the tropics is the east-west  
164 atmospheric circulation over the tropical Pacific, namely the Pacific Walker  
165 Circulation (PWC). This circulation consists of rising air motion over South-  
166 east Asia and its surrounding Oceans, namely the Indian Ocean and the  
167 western Pacific, and descending air motion over the eastern Pacific. The PWC  
168 is a crucial component of the global atmospheric circulation, and is closely  
169 connected to ENSO. Because of its potential to influence weather patterns  
170 well beyond the Indo-Pacific region, understanding how PWC changes under  
171 global warming is a critical piece in understanding future global climate. Past  
172 studies have reached different conclusions regarding changes in PWC. Some  
173 studies observed a weakened PWC [19–21], whereas most recent studies found  
174 a strengthened PWC [22–26]. Today, the community seems to have reached  
175 consensus on the strengthening of PWC. Yet, whether this strengthening is  
176 due to anthropogenic forcing or internal variability remains a subject of lively  
177 debate [27, 28].

178 Some model-based studies suggest that this phenomenon can be attributed  
179 to internal variability [22, 29, 30]. However, the inability of the majority of  
180 general circulation models (GCMs) in CMIP5 and CMIP6 to reproduce the  
181 strengthening of PWC raises concerns [31, 32]. Indeed, some studies suggest

182 that PWC strengthening is driven by anthropogenic forcing and that current  
183 climate models may contain a *cold-tongue* bias in the Pacific that undermines  
184 climate projections for the region [33, 34].

185 Besides changes in PWC, other mechanisms may also drive changes of  
186 tropical weather patterns. A link was found between the expansion of the Indo-  
187 Pacific warm pool and the changes of MJO life cycle, increasing the residence  
188 time of MJO over the Maritime Continent [18]. Studies also suggest that Indian  
189 and Atlantic Oceans’ warming [25, 31], multidecadal internal variability in  
190 the Atlantic [35], and eruptions of major volcanoes [35] can contribute to  
191 weather changes in the tropics. The focus of this study is on the intersection  
192 between the changing large-scale atmospheric circulation in the tropics, i.e., the  
193 strengthening of PWC, and its implications for weather patterns and extremes.

194 To this end, it is crucial to identify their underlying climate drivers, and  
195 their link to the changing atmospheric dynamics and circulation. Indeed, given  
196 the inherent complexity of the tropical Indo-Pacific climate, disentangling the  
197 relative roles of anthropogenic forcing and internal variability on the changing  
198 weather patterns in the tropics remains an open and daunting task.

## 199 **8.2 Competing work on weather extremes in the Indo-Pacific**

200 Recent observations point to more frequent and intense extreme weather events  
201 in the tropical Indo-Pacific region, especially in Southeast Asia. These include  
202 heat waves, extreme precipitation and lack thereof, that are leading to life-  
203 threatening temperatures, flooding and droughts [36–38]. For instance, using  
204 various observation and reanalysis datasets, heat waves were found to be  
205 more frequent, more persistent, and more intense in most parts of South-  
206 east Asia [39]. Using statistical trend analyses, [40] found significant changes  
207 of precipitation extremes during 1981–2017 over Southeast Asia. Although  
208 these studies have provided valuable insights into regional climate changes



209 in the tropical Indo-Pacific region, and Southeast Asia in particular, the link  
210 between individual circulation patterns with specific weather patterns and  
211 extremes have not been comprehensively investigated. Indeed, the majority of  
212 the research efforts in this area have focused on the average atmospheric circu-  
213 lation state and how its change affects the frequency and intensity of extreme  
214 weather events. Ensemble-model-based projections of precipitation extremes in  
215 Southeast Asia also found increasing extremes, albeit these vary across regions,  
216 seasons and warming scenarios, suggesting a high-level of uncertainty on future  
217 changes [41]. Characterizing the climate and atmospheric drivers underly-  
218 ing extreme weather events is essential to understand their future behaviour  
219 and equip policy makers with valuable tools to implement effective climate  
220 resilience strategies.

## 221 References

- 222 [1] Li, J., Liang, C., Tang, Y., Dong, C., Chen, D., Liu, X., Jin, W.: A  
223 new dipole index of the salinity anomalies of the tropical indian ocean.  
224 Scientific Reports **6**(1), 24260 (2016)
- 225 [2] Scoccimarro, E., Villarini, G., Gualdi, S., Navarra, A.: The pacific decadal  
226 oscillation modulates tropical cyclone days on the interannual timescale  
227 in the north pacific ocean. Journal of Geophysical Research: Atmospheres  
228 **126**(15), 2021–034988 (2021)
- 229 [3] Apaéstegui, J., Cruz, F.W., Sifeddine, A., Vuille, M., Espinoza, J., Guyot,  
230 J.-L., Khodri, M., Strikis, N., Santos, R., Cheng, H., *et al.*: Hydroclimate  
231 variability of the northwestern amazon basin near the andean foothills of  
232 peru related to the south american monsoon system during the last 1600  
233 years. Climate of the Past **10**(6), 1967–1981 (2014)

- 234 [4] Wang, S., Huang, J., He, Y., Guan, Y.: Combined effects of the pacific  
235 decadal oscillation and el nino-southern oscillation on global land dry-wet  
236 changes. *Scientific reports* **4**(1), 6651 (2014)
- 237 [5] McCabe, G.J., Palecki, M.A., Betancourt, J.L.: Pacific and atlantic  
238 ocean influences on multidecadal drought frequency in the united states.  
239 *Proceedings of the National Academy of Sciences* **101**(12), 4136–4141  
240 (2004)
- 241 [6] Hanley, D.E., Bourassa, M.A., O’Brien, J.J., Smith, S.R., Spade, E.R.: A  
242 quantitative evaluation of enso indices. *Journal of Climate* **16**(8), 1249–  
243 1258 (2003)
- 244 [7] Villafuerte, M.Q., Matsumoto, J.: Significant influences of global mean  
245 temperature and enso on extreme rainfall in southeast asia. *Journal of*  
246 *Climate* **28**(5), 1905–1919 (2015)
- 247 [8] Räsänen, T.A., Lindgren, V., Guillaume, J.H., Buckley, B.M., Kummu,  
248 M.: On the spatial and temporal variability of enso precipitation and  
249 drought teleconnection in mainland southeast asia. *Climate of the Past*  
250 **12**(9), 1889–1905 (2016)
- 251 [9] Saji, N., Yamagata, T.: Possible impacts of indian ocean dipole mode  
252 events on global climate. *Climate Research* **25**(2), 151–169 (2003)
- 253 [10] Vinayachandran, P., Francis, P., Rao, S.: Indian ocean dipole: processes  
254 and impacts. *Current trends in science* **46**(10), 569–589 (2009)
- 255 [11] Zhang, C.: Madden-julian oscillation. *Reviews of Geophysics* **43**(2) (2005)

- 256 [12] Xavier, P., Rahmat, R., Cheong, W.K., Wallace, E.: Influence of madden-  
257 julian oscillation on southeast asia rainfall extremes: observations and  
258 predictability. *Geophysical Research Letters* **41**(12), 4406–4412 (2014)
- 259 [13] Da Silva, N.A., Matthews, A.J.: Impact of the madden–julian oscillation  
260 on extreme precipitation over the western maritime continent and south-  
261 east asia. *Quarterly Journal of the Royal Meteorological Society* **147**(739),  
262 3434–3453 (2021)
- 263 [14] Lau, K., Yang, S.: Climatology and interannual variability of the southeast  
264 asian summer monsoon. *Advances in Atmospheric Sciences* **14**, 141–162  
265 (1997)
- 266 [15] Loo, Y.Y., Billa, L., Singh, A.: Effect of climate change on seasonal mon-  
267 soon in asia and its impact on the variability of monsoon rainfall in  
268 southeast asia. *Geoscience Frontiers* **6**(6), 817–823 (2015)
- 269 [16] Molteni, F., Stockdale, T.N., Vitart, F.: Understanding and modelling  
270 extra-tropical teleconnections with the indo-pacific region during the  
271 northern winter. *Climate dynamics* **45**, 3119–3140 (2015)
- 272 [17] Feba, F., Ashok, K., Ravichandran, M.: Role of changed indo-pacific atmo-  
273 spheric circulation in the recent disconnect between the indian summer  
274 monsoon and enso. *Climate Dynamics* **52**, 1461–1470 (2019)
- 275 [18] Roxy, M., Dasgupta, P., McPhaden, M.J., Suematsu, T., Zhang, C., Kim,  
276 D.: Twofold expansion of the indo-pacific warm pool warps the mjo life  
277 cycle. *Nature* **575**(7784), 647–651 (2019)
- 278 [19] Vecchi, G.A., Soden, B.J., Wittenberg, A.T., Held, I.M., Leetmaa, A.,  
279 Harrison, M.J.: Weakening of tropical pacific atmospheric circulation due

- 280 to anthropogenic forcing. *Nature* **441**(7089), 73–76 (2006)
- 281 [20] Tokinaga, H., Xie, S.-P., Deser, C., Kosaka, Y., Okumura, Y.M.: Slow-  
282 down of the walker circulation driven by tropical indo-pacific warming.  
283 *Nature* **491**(7424), 439–443 (2012)
- 284 [21] Power, S.B., Kociuba, G.: What caused the observed twentieth-century  
285 weakening of the walker circulation? *Journal of Climate* **24**(24), 6501–  
286 6514 (2011)
- 287 [22] England, M.H., McGregor, S., Spence, P., Meehl, G.A., Timmermann, A.,  
288 Cai, W., Gupta, A.S., McPhaden, M.J., Purich, A., Santoso, A.: Recent  
289 intensification of wind-driven circulation in the pacific and the ongoing  
290 warming hiatus. *Nature climate change* **4**(3), 222–227 (2014)
- 291 [23] Takahashi, C., Watanabe, M.: Pacific trade winds accelerated by aerosol  
292 forcing over the past two decades. *Nature Climate Change* **6**(8), 768–772  
293 (2016)
- 294 [24] Sohn, B., Yeh, S.-W., Schmetz, J., Song, H.-J.: Observational evidences  
295 of walker circulation change over the last 30 years contrasting with gcm  
296 results. *Climate Dynamics* **40**, 1721–1732 (2013)
- 297 [25] McGregor, S., Timmermann, A., Stuecker, M.F., England, M.H., Merri-  
298 field, M., Jin, F.-F., Chikamoto, Y.: Recent walker circulation strength-  
299 ening and pacific cooling amplified by atlantic warming. *Nature Climate*  
300 *Change* **4**(10), 888–892 (2014)
- 301 [26] Ma, S., Zhou, T.: Robust strengthening and westward shift of the tropical  
302 pacific walker circulation during 1979–2012: A comparison of 7 sets of  
303 reanalysis data and 26 cmip5 models. *Journal of Climate* **29**(9), 3097–3118

304 (2016)

- 305 [27] Heede, U.K., Fedorov, A.V., Burls, N.J.: Time scales and mechanisms for  
306 the tropical pacific response to global warming: A tug of war between the  
307 ocean thermostat and weaker walker. *Journal of Climate* **33**(14), 6101–  
308 6118 (2020)
- 309 [28] Heede, U.K., Fedorov, A.V., Burls, N.J.: A stronger versus weaker walker:  
310 understanding model differences in fast and slow tropical pacific responses  
311 to global warming. *Climate Dynamics* **57**(9-10), 2505–2522 (2021)
- 312 [29] Chung, E.-S., Timmermann, A., Soden, B.J., Ha, K.-J., Shi, L., John,  
313 V.O.: Reconciling opposing walker circulation trends in observations and  
314 model projections. *Nature Climate Change* **9**(5), 405–412 (2019)
- 315 [30] Douville, H., Voltaire, A., Geoffroy, O.: The recent global warming hiatus:  
316 What is the role of pacific variability? *Geophysical Research Letters* **42**(3),  
317 880–888 (2015)
- 318 [31] Kociuba, G., Power, S.B.: Inability of cmip5 models to simulate recent  
319 strengthening of the walker circulation: Implications for projections.  
320 *Journal of Climate* **28**(1), 20–35 (2015)
- 321 [32] Coats, S., Karneuskas, K.: Are simulated and observed twentieth cen-  
322 tury tropical pacific sea surface temperature trends significant relative  
323 to internal variability? *Geophysical Research Letters* **44**(19), 9928–9937  
324 (2017)
- 325 [33] Kohyama, T., Hartmann, D.L., Battisti, D.S.: La niña-like mean-state  
326 response to global warming and potential oceanic roles. *Journal of Climate*  
327 **30**(11), 4207–4225 (2017)

- 328 [34] Seager, R., Cane, M., Henderson, N., Lee, D.-E., Abernathey, R., Zhang,  
329 H.: Strengthening tropical pacific zonal sea surface temperature gradient  
330 consistent with rising greenhouse gases. *Nature Climate Change* **9**(7),  
331 517–522 (2019)
- 332 [35] Sun, C., Kucharski, F., Li, J., Jin, F.-F., Kang, I.-S., Ding, R.: Western  
333 tropical pacific multidecadal variability forced by the atlantic multi-  
334 decadal oscillation. *Nature communications* **8**(1), 15998 (2017)
- 335 [36] Phan-Van, T., Nguyen-Ngoc-Bich, P., Ngo-Duc, T., Vu-Minh, T., Le,  
336 P.V., Trinh-Tuan, L., Nguyen-Thi, T., Pham-Thanh, H., Tran-Quang, D.:  
337 Drought over southeast asia and its association with large-scale drivers.  
338 *Journal of Climate* **35**(15), 4959–4978 (2022)
- 339 [37] Dong, Z., Wang, L., Sun, Y., Hu, T., Limsakul, A., Singhruck, P., Pimon-  
340 sree, S.: Heatwaves in southeast asia and their changes in a warmer world.  
341 *Earth’s Future* **9**(7), 2021–001992 (2021)
- 342 [38] Caesar, J., Alexander, L., Trewin, B., Tse-Ring, K., Sorany, L.,  
343 Vuniyayawa, V., Keosavang, N., Shimana, A., Htay, M., Karmacharya, J.,  
344 *et al.*: Changes in temperature and precipitation extremes over the indo-  
345 pacific region from 1971 to 2005. *International Journal of Climatology*  
346 **31**(6), 791–801 (2011)
- 347 [39] Li, X.-X., Yuan, C., Hang, J.: Heat wave trends in southeast asia: compar-  
348 ison of results from observation and reanalysis data. *Geophysical Research*  
349 *Letters* **49**(4), 2021–097151 (2022)
- 350 [40] Fan, Y., Li, J., Zhu, S., Li, H., Zhou, B.: Trends and variabilities of precip-  
351 itation and temperature extremes over southeast asia during 1981–2017.

352

- 353 [41] Tangang, F., Juneng, L., Cruz, F., Chung, J.X., Ngai, S.T., Salimun,  
354 E., Mohd, M.S.F., Santisirisomboon, J., Singhruck, P., PhanVan, T., *et*  
355 *al.*: Multi-model projections of precipitation extremes in southeast asia  
356 based on cordex-southeast asia simulations. Environmental Research **184**,  
357 109350 (2020)
